# Supplementary material for: Common miRNAs of Osteoporosis and Fibromyalgia: A Review
Source: MDPI journal article supplement (doi:10.3390/ijms241713513), 2023-08-31
Supplement: s1 [file s1]

Table S1: List of dysregulated miRNAs (n = 46) in studies comparing fibromyalgia patients to healthy volunteers (miRNAs are presented according to their nomenclature).

| Differentially expressed microRNAs in fibromyalgia |             |            |            |
|----------------------------------------------------|-------------|------------|------------|
| microRNA                                           | No. studies | Regulation | References |
| Same direction for FM and OP                       |             |            |            |
| miR-1                                              | n = 1       | ↓          | [28]       |
| let-7a-5p                                          | n = 1       | ↓          | [29]       |
| miR-9-5p                                           | n = 1       | ↑          | [30]       |
| miR-29a-3p                                         | n = 1       | ↓          | [31]       |
| miR-128-3p                                         | n = 1       | ↑          | [30]       |
| miR-328-3p                                         | n = 1       | ↓          | [30]       |
| miR-335-5p                                         | n = 1       | ↑          | [32]       |
| Opposite direction for FM and OP                   |             |            |            |
| miR-7-5p                                           | n = 1       | ↑          | [30]       |
| miR-23b-3p                                         | n = 1       | ↓          | [31]       |
| miR-107                                            | n = 2       | ↓          | [29,33]    |
| miR-139-5p                                         | n = 1       | ↓          | [28]       |
| miR-143-3p                                         | n = 1       | ↓          | [34]       |
| miR-151a-5p                                        | n = 1       | ↓          | [29]       |
| miR-186-5p                                         | n = 1       | ↑          | [30]       |
| miR-338-3p                                         | n = 1       | ↓          | [34]       |
| miR-766-3p                                         | n = 1       | ↓          | [30]       |
| Same or opposite direction for FM and OP           |             |            |            |
| miR-21-5p                                          | n = 1       | ↓          | [31]       |
| miR-23a-3p                                         | n = 1       | ↓          | [28]       |
| miR-133a                                           | n = 1       | ↓          | [28]       |
| miR-145-5p                                         | n = 2       | ↓          | [31,34]    |
| miR-148a-3p                                        | n = 1       | ↑          | [30]       |
| miR-320a                                           | n = 1       | ↑          | [29]       |
| miR-532-3p                                         | n = 1       | ↓          | [30]       |
| Other miRNAs found                                 |             |            |            |
| let-7d                                             | n = 1       | ↓          | [35]       |
| miR-27b-3p                                         | n = 1       | ↑          | [30]       |
| miR-30b-5p                                         | n = 1       | ↓          | [29]       |
| miR-101-3p                                         | n = 1       | ↑          | [30]       |
| miR-103a-(3p)                                      | n = 3       | ↓          | [29,33,35] |
| miR-125a-5p                                        | n = 1       | ↑          | [33]       |
| miR-130a-3p                                        | n = 1       | ↓          | [33]       |
| miR-142-3p                                         | n = 1       | ↓          | [29]       |

|             |       |   |         |
|-------------|-------|---|---------|
| miR-146a    | n = 1 | ↓ | [35]    |
| miR-182-5p  | n = 1 | ↑ | [30]    |
| miR-183-5p  | n = 1 | ↑ | [30]    |
| miR-223-3p  | n = 2 | ↓ | [31,34] |
| miR-320b    | n = 1 | ↓ | [28]    |
| miR-346     | n = 1 | ↓ | [28]    |
| miR-374a-5p | n = 1 | ↑ | [30]    |
| miR-374b-5p | n = 1 | ↓ | [29]    |
| miR-451a    | n = 1 | ↓ | [34]    |
| miR-454-3p  | n = 1 | ↑ | [30]    |
| miR-548d-5p | n = 1 | ↑ | [30]    |
| miR-625-5p  | n = 1 | ↓ | [30]    |
| miR-671-5p  | n = 1 | ↓ | [30]    |
| miR-1275    | n = 1 | ↓ | [30]    |
| miR-3609    | n = 1 | ↓ | [30]    |

Table S2: List of dysregulated miRNAs (n = 166) in studies comparing osteoporosis patients to healthy volunteers (miRNAs are presented according to their nomenclature).

| microRNA                         | No. studies | Regulation | References |
|----------------------------------|-------------|------------|------------|
| Same direction for FM and OP     |             |            |            |
| miR-1-3p                         | n = 2       | ↓          | [36,37]    |
| let-7a-3p                        | n = 1       | ↓          | [37]       |
| miR-9-(3p or 5p)                 | n = 2       | ↑          | [38,39]    |
| miR-29a-3p                       | n = 1       | ↓          | [23]       |
| miR-128                          | n = 1       | ↑          | [40]       |
| miR-328-3p                       | n = 1       | ↓          | [41]       |
| miR-335-5p                       | n = 2       | ↑          | [42,43]    |
| Opposite direction for FM and OP |             |            |            |
| miR-7-5p                         | n = 1       | ↓          | [42]       |
| miR-23b-(3p)                     | n = 2       | ↑          | [44,45]    |

|             |       |   |         |
|-------------|-------|---|---------|
| miR-107     | n = 1 | ↑ | [46]    |
| miR-139-5p  | n = 1 | ↑ | [44]    |
| miR-143     | n = 1 | ↑ | [47]    |
| miR-151a-3p | n = 2 | ↑ | [48,49] |
| miR-186-5p  | n = 1 | ↓ | [42]    |
| miR-338-3p  | n = 1 | ↑ | [50]    |
| miR-766-5p  | n = 1 | ↑ | [51]    |

Same or opposite direction for FM and OP

|                    |        |    |                           |
|--------------------|--------|----|---------------------------|
| miR-21-(5p)        | n = 12 | ↑↓ | [23,41,43,52–0]           |
| miR-23a-(3p or 5p) | n = 8  | ↑↓ | [23,41,43,52,53,56,59,61] |
| miR-133a           | n = 5  | ↑↓ | [37,57,62–64]             |
| miR-145-(3p or 5p) | n = 2  | ↑↓ | [65,66]                   |
| miR-148a-(3p)      | n = 5  | ↑↓ | [56,59,66–68]             |
| miR-320a           | n = 4  | ↑↓ | [42,53,69,70]             |
| miR-532-(3p or 5p) | n = 4  | ↑↓ | [42,43,71,72]             |

Other miRNAs found

|                   |       |    |               |
|-------------------|-------|----|---------------|
| let-7b-5p         | n = 1 | ↓  | [42]          |
| let-7c            | n = 1 | ↑  | [73]          |
| let-7g-5p         | n = 2 | ↓  | [41,74]       |
| miR-10a-3p        | n = 2 | ↑  | [75,76]       |
| miR-10b-5p        | n = 3 | ↑↓ | [37,41,66]    |
| miR-15a-5p        | n = 1 | ↓  | [77]          |
| miR-15b-5p        | n = 1 | ↓  | [66]          |
| miR-16-5p         | n = 1 | ↓  | [42]          |
| miR-17-5p         | n = 2 | ↑  | [37,44]       |
| miR-17-92a        | n = 1 | ↓  | [78]          |
| miR-18a-3p        | n = 2 | ↑  | [79,80]       |
| miR-19a-3p        | n = 2 | ↓  | [42,81]       |
| miR-19b-3p        | n = 4 | ↑↓ | [42,43,66,82] |
| miR-22-3p         | n = 3 | ↓  | [41,74,83]    |
| miR-24-(3p)       | n = 3 | ↑  | [56,59,84]    |
| miR-25-(3p or 5p) | n = 3 | ↑  | [51,59,85]    |
| miR-26a           | n = 1 | ↑  | [86]          |
| miR-27a-(3p)      | n = 4 | ↑↓ | [87–90]       |
| miR-29b-3p        | n = 3 | ↓  | [42,91,92]    |
| miR-30(a-5p)      | n = 3 | ↑↓ | [93–95]       |
| miR-30c-5p        | n = 1 | ↓  | [42]          |
| miR-31            | n = 1 | ↑  | [96]          |
| miR-34c-3p        | n = 1 | ↑  | [37]          |
| miR-92b-3p        | n = 1 | ↓  | [66]          |

|                     |       |    |                                |
|---------------------|-------|----|--------------------------------|
| miR-93-(5p)         | n = 4 | ↑↓ | [42,56,59,97]                  |
| miR-96              | n = 2 | ↑  | [46,94]                        |
| miR-99b-5p          | n = 1 | ↓  | [75]                           |
| miR-100-(5p)        | n = 7 | ↑  | [37,41,56,59,84,98,99]         |
| miR-106b-5p         | n = 1 | ↓  | [66]                           |
| miR-122(a-5p)       | n = 5 | ↑↓ | [56,58,59,67,100]              |
| miR-124(a-3p)       | n = 3 | ↑  | [23,56,59]                     |
| miR-125b-(5p)       | n = 9 | ↑↓ | [41,52,56,58,59,84,94,101,102] |
| miR-127-(3p or 5p)  | n = 3 | ↑↓ | [38,41,103]                    |
| miR-133b            | n = 1 | ↓  | [37]                           |
| miR-135a-5p         | n = 1 | ↑  | [104]                          |
| miR-135b-5p         | n = 1 | ↑  | [105]                          |
| miR-137-(3p)        | n = 2 | ↑  | [38,106]                       |
| miR-138-5p          | n = 1 | ↑  | [38]                           |
| miR-140-(3p or 5p)  | n = 3 | ↑↓ | [42,44,107]                    |
| miR-144-(3p or 5p)  | n = 4 | ↑↓ | [66,84,108,109]                |
| miR-150-(5p)        | n = 2 | ↑↓ | [110,111]                      |
| miR-152-3p          | n = 2 | ↓  | [42,43]                        |
| miR-155-(5p)        | n = 3 | ↑↓ | [112–114]                      |
| miR-181a-2-3p       | n = 1 | ↑  | [75]                           |
| miR-181c-5p         | n = 1 | ↓  | [115]                          |
| miR-187             | n = 1 | ↓  | [116]                          |
| miR-193b-(3p or 5p) | n = 1 | ↓  | [37]                           |
| miR-194-5p          | n = 1 | ↑  | [117]                          |
| miR-195             | n = 1 | ↓  | [110]                          |
| miR-197-3p          | n = 1 | ↑  | [44]                           |
| miR-200a-3p         | n = 1 | ↑  | [118]                          |
| miR-200b-3p         | n = 1 | ↑  | [38]                           |
| miR-203             | n = 2 | ↓  | [119,120]                      |
| miR-205-5p          | n = 2 | ↑  | [121,122]                      |
| miR-206             | n = 3 | ↑↓ | [37,38,123]                    |
| miR-208a-3p         | n = 1 | ↑  | [112]                          |
| miR-210-3p          | n = 1 | ↑  | [124]                          |
| miR-211-5p          | n = 1 | ↓  | [125]                          |
| miR-214-(3p)        | n = 2 | ↑↓ | [37,126]                       |
| miR-215-5p          | n = 2 | ↓  | [42,127]                       |
| miR-217             | n = 2 | ↑  | [128,129]                      |
| miR-219a-2-3p       | n = 1 | ↑  | [38]                           |
| miR-221-(5p)        | n = 2 | ↓  | [130,131]                      |
| miR-222             | n = 1 | ↑  | [110]                          |
| miR-224-3p          | n = 1 | ↑  | [51]                           |
| miR-302a-3p         | n = 1 | ↓  | [51]                           |
| miR-324-3p          | n = 1 | ↓  | [42]                           |

|                    |       |    |               |
|--------------------|-------|----|---------------|
| miR-340-5p         | n = 1 | ↑  | [109]         |
| miR-361-5p         | n = 1 | ↑  | [132]         |
| miR-363-3p         | n = 1 | ↑  | [133]         |
| miR-365a-3p        | n = 3 | ↑↓ | [42,114,134]  |
| miR-373            | n = 1 | ↓  | [135]         |
| miR-374c-3p        | n = 1 | ↓  | [66]          |
| miR-375            | n = 2 | ↑  | [43,136]      |
| miR-378a-5p        | n = 1 | ↓  | [42]          |
| miR-378g           | n = 1 | ↓  | [137]         |
| miR-410            | n = 1 | ↑  | [138]         |
| miR-422a           | n = 1 | ↑  | [139]         |
| miR-423-5p         | n = 1 | ↑  | [114]         |
| miR-455-3p         | n = 1 | ↓  | [140]         |
| miR-483-(3p or 5p) | n = 4 | ↑↓ | [69,141–143]  |
| miR-485-5p         | n = 1 | ↑  | [144]         |
| miR-486-3p         | n = 1 | ↓  | [145]         |
| miR-495-3p         | n = 1 | ↓  | [38]          |
| miR-497-5p         | n = 3 | ↑↓ | [114,115,146] |
| miR-498            | n = 1 | ↑  | [147]         |
| miR-499a-5p        | n = 1 | ↓  | [37]          |
| miR-500a-5p        | n = 1 | ↓  | [38]          |
| miR-503            | n = 1 | ↓  | [148]         |
| miR-506-3p         | n = 1 | ↑  | [109]         |
| miR-518(f)         | n = 2 | ↑↓ | [41,116]      |
| miR-548aa          | n = 1 | ↑  | [37]          |
| miR-548t-3p        | n = 1 | ↑  | [37]          |
| miR-548x-3p        | n = 1 | ↑  | [149]         |
| miR-550a-3p        | n = 1 | ↓  | [42]          |
| miR-579-3p         | n = 1 | ↑  | [150]         |
| miR-582-3p         | n = 1 | ↑  | [151]         |
| miR-627-5p         | n = 1 | ↑  | [37]          |
| miR-629-5p         | n = 1 | ↑  | [37]          |
| miR-637            | n = 1 | ↑  | [112]         |
| miR-642a-3p        | n = 1 | ↑  | [51]          |
| miR-655-3p         | n = 1 | ↓  | [75]          |
| miR-668-3p         | n = 1 | ↓  | [75]          |
| miR-708-(5p)       | n = 2 | ↑↓ | [152,153]     |
| miR-758-3p         | n = 1 | ↓  | [75]          |
| miR-760            | n = 1 | ↑  | [37]          |
| miR-874-3p         | n = 1 | ↓  | [154]         |
| miR-885-5p         | n = 1 | ↑  | [44]          |
| miR-889-3p         | n = 1 | ↑  | [155]         |
| miR-920            | n = 1 | ↓  | [156]         |

|              |       |    |             |
|--------------|-------|----|-------------|
| miR-1227-3p  | n = 1 | ↑  | [44]        |
| miR-1249-5p  | n = 1 | ↓  | [157]       |
| miR-1270     | n = 1 | ↑  | [158]       |
| miR-1271-5p  | n = 2 | ↑↓ | [38,159]    |
| miR-1286     | n = 1 | ↑  | [160]       |
| miR-1297     | n = 1 | ↑  | [161]       |
| miR-1299     | n = 1 | ↓  | [75]        |
| miR-1915-5p  | n = 1 | ↓  | [38]        |
| miR-2278     | n = 1 | ↓  | [75]        |
| miR-2861     | n = 3 | ↑↓ | [23,41,162] |
| miR-3065-5p  | n = 1 | ↑  | [50]        |
| miR-3119     | n = 1 | ↓  | [38]        |
| miR-3168     | n = 1 | ↓  | [38]        |
| miR-3190-5p  | n = 1 | ↓  | [75]        |
| miR-3191-3p  | n = 1 | ↓  | [75]        |
| miR-3656     | n = 1 | ↑  | [37]        |
| miR-3678-3p  | n = 1 | ↓  | [75]        |
| miR-3679     | n = 1 | ↑  | [163]       |
| miR-3690     | n = 1 | ↓  | [75]        |
| miR-4274     | n = 1 | ↑  | [163]       |
| miR-4516     | n = 1 | ↓  | [100]       |
| miR-4665-3p  | n = 1 | ↑  | [94]        |
| miR-4731-3p  | n = 1 | ↓  | [38]        |
| miR-4767     | n = 1 | ↓  | [38]        |
| miR-5009-5p  | n = 1 | ↑  | [75]        |
| miR-5914     | n = 1 | ↑  | [94]        |
| miR-6511a-3p | n = 1 | ↑  | [37]        |
| miR-6741-3p  | n = 1 | ↑  | [38]        |
| miR-4746-3p  | n = 1 | ↓  | [38]        |
| miR-6803-5p  | n = 1 | ↑  | [38]        |
| miR-6851-3p  | n = 1 | ↑  | [109]       |
| miR-6886-3p  | n = 1 | ↓  | [38]        |
| miR-8068     | n = 1 | ↑  | [109]       |

---

Table S3: Characteristics of fibromyalgia studies with miRNAs in common with osteoporosis studies (n = 7)

| First author, year        | Tissue                             | Extraction Detection | Study design | Sample size    | Age (years)                 | Gender                                          | Primary outcome                                                                                                                                                              | Reference |
|---------------------------|------------------------------------|----------------------|--------------|----------------|-----------------------------|-------------------------------------------------|------------------------------------------------------------------------------------------------------------------------------------------------------------------------------|-----------|
| Bjersing et al., 2013     | cerebro spinal fluid               | Q<br>q               | case-control | 10 FM<br>8 HV  | 48.5<br>58.5                | FM: 100% F<br>HV: NK                            | To identify cerebrospinal miRNAs with expression specific for FM and to determine their correlation to pain and fatigue.                                                     | [31]      |
| Bjersing et al., 2015     | serum                              | Q<br>q               | case-control | 20 FM<br>20 HV | 52.5                        | 100% F                                          | To identify characteristic miRNAs in FM and relations of specific miRNAs with characteristic symptoms                                                                        | [29]      |
| Braun et al., 2020        | white blood cell                   | Q<br>q               | case-control | 31 FM<br>16 HV | 50.7<br>NK                  | FM: 100% F<br>HV: NK                            | To identify miRNA signatures distinguishing patient clusters with FM.                                                                                                        | [33]      |
| Cerdá-Olmedo et al., 2015 | peripheral blood mononuclear cells | ITF<br>q             | case-control | 11 FM<br>10 HV | 50.7<br>47.5                | FM: 100% F<br>HV: NK                            | To identify changes in miRNA expression profiles (miRNome) of FM patients for the development of a quantitative diagnostic method of FM                                      | [34]      |
| Clos-Garcia et al., 2019  | serum                              | NK<br>m              | case-control | 36 FM<br>36 HV | 52,52 ± 10,3<br>53,5 ± 12,4 | FM: 69,5% F, 30,48% M<br>HV: 48,15% F, 51,85% M | To identify potential molecular biomarkers for FM diagnosis and characterization, with different omics technologies.                                                         | [32]      |
| Erbacher et al., 2022     | whole blood                        | TF<br>q              | case-control | 49 FM<br>25 HV | 53                          | 100% F                                          | To profile microRNA regulators of cholinergic transcripts (CholinomiRs)                                                                                                      | [30]      |
| Masotti et al., 2017      | serum (& saliva)                   | Q<br>q               | case-control | 14 FM<br>14 HV | NK                          | 100% F                                          | To investigate the c-miRNA profiles in FM, correlating their expression with clinical and clinimetric parameters and to suggest a mathematical model for the diagnosis of FM | [28]      |

Abbreviations: c-miRNA, circulating miRNA; F, Female; FM, fibromyalgia; HV, Healthy Volunteers; ITF, Invitrogen Thermo Fisher; M, Male; m, multiplex assays; NK, not know; q, Quantitative Reverse Transcription Polymerase Chain Reaction; Q, Qiagen; TF, Thermo Fisher

Table S4: Characteristics of osteoporosis studies with miRNAs in common with fibromyalgia studies (n = 38)

| First author, Year     | Tissue      | Extraction Detection | Study design    | Gender                                       | Sample size       | Age (years)                 | Primary outcome                                                                                                                                                                                                   | Reference |
|------------------------|-------------|----------------------|-----------------|----------------------------------------------|-------------------|-----------------------------|-------------------------------------------------------------------------------------------------------------------------------------------------------------------------------------------------------------------|-----------|
| Al-Rawaf et al., 2021  | serum       | Q<br>q               | cross-sectional | 100% F<br>PM                                 | 55 OP<br>45 HV    | 63.9 ± 3.2<br>62.6 ± 4.1    | Potential diagnostic role of circulating miRNAs, miR-148a and miR-122-5p, in the pathogenesis of OP and its association with bone markers, hypercortisolism, and vitamin D deficiency                             | [67]      |
| Bedene et al., 2016    | plasma      | Q<br>q               | case-control    | 100% F<br>PM                                 | 17 OP<br>57 HV    | 62<br>61                    | To identify c-miRNAs which could serve as potential biomarkers.                                                                                                                                                   | [68]      |
| Chen et al., 2018      | serum       | ITF<br>q             | cross-sectional | NK                                           | 9 OP<br>9 HV      | 69.2 ± 2.7<br>67.1 ± 2.6    | To find the early diagnostic marker for OP using c-miRNAs                                                                                                                                                         | [41]      |
| Chen et al., 2019      | serum       | Q<br>q               | case-control    | 100% F<br>PM                                 | 46 OP<br>13 HV    | 69.6 ± 5.6<br>68.9 ± 6.5    | To examine the difference in bone and muscle specific c-miRNAs in PM women based on their bone and muscle status, and to determine the associations between these specific c-miRNAs and muscle and bone variables | [52]      |
| Ciuffi et al., 2022    | serum       | Q<br>NGS             | case-control    | OP: 74% F, 26% M<br>HV: 73.3% F, 36.7% M     | 50 OP<br>30 HV    | 68.0 ± 4.9<br>67.2 ± 5.0    | Measure global miRNA expression in OP vs normal BMD.                                                                                                                                                              | [53]      |
| Cong et al., 2020      | plasma      | ITF<br>q             | cross-sectional | 42 F, 24 M<br>for OP and HV                  | 66 OP<br>66 HV    | 54,1 ± 5,3<br>54,3 ± 5,2    | To investigate the interactions between miR-21 and GAS5                                                                                                                                                           | [54]      |
| De-Ugarte et al., 2015 | bone        | Q<br>q               | cross-sectional | 100% F<br>PM                                 | 6 OP<br>6 HV      | 75,16 ± 3,54<br>72,5 ± 7,42 | To identify miRNAs differentially expressed in fractured vs non-fractured bones.                                                                                                                                  | [69]      |
| Fu et al., 2020        | whole blood | ITF<br>q             | cross-sectional | 100% F                                       | 11 PM OP<br>11 HV | NK                          | To investigate the expression level of miR-151a-3p and asses it effects on bone formation and resorption                                                                                                          | [48]      |
| Fu et al., 2021        | serum       | ITF<br>q             | cross-sectional | OP: 73.2% F, 26.8% M<br>HV: 73.4% F, 26.6% M | 82 OP<br>79 HV    | 50.48 ± 3.5<br>49.68 ± 4.17 | To investigate the effects of ROR and miR-145-5p on the proliferation and apoptosis of osteoblasts.                                                                                                               | [65]      |



Table S4: Continued

| First author, Year   | Tissue       | Extraction Detection | Study design    | Gender                                  | Sample size                                         | Age (years)                  | Primary outcome                                                                                                                                       | Reference |
|----------------------|--------------|----------------------|-----------------|-----------------------------------------|-----------------------------------------------------|------------------------------|-------------------------------------------------------------------------------------------------------------------------------------------------------|-----------|
| Gao et al., 2018     | hBMSCs       | ITF q                | cross-sectional | 2 F, 1 M for OP and HV                  | 3 OP<br>3 HV                                        | 47 - 66<br>45 - 63           | To investigate whether MALAT1 regulates Osterix expression by sponging miR-143 to promote hBMSCs osteogenic differentiation.                          | [47]      |
| Gu et al., 2020      | hBMSCs       | ITF s                | cross-sectional | 100% F                                  | 29 PM OP<br>20 HV                                   | 67.5 ± 9.52<br>65.27 ± 7.63  | To identify miRNAs and investigate the role of miR-1-3p in the shift from OP and adipogenesis of hBMSCs in vitro and bone metabolism in vivo.         | [36]      |
| Guo et al., 2020     | bone         | ITF q                | cross-sectional | 100% F<br>PM                            | 10 OP<br>10 HV                                      | 62.15 ± 3.54<br>63.44 ± 6.07 | To investigate whether miR-532-5p plays a role in the regulation of osteoporosis.                                                                     | [71]      |
| He et al., 2021      | serum        | ITF q                | cross-sectional | 100% F<br>PM                            | 15 OP<br>15 HV                                      | 57 - 80<br>61 - 76           | To explore the biological functions of miRNA-151a-3p in OP                                                                                            | [49]      |
| Jiang et al., 2020   | hBMSCs       | NK q                 | cross-sectional | 100% F<br>PM                            | 25 OP<br>25 HV                                      | ≥ 65                         | To determine the role and mechanism of miR-23 with respect to regulating the osteogenic differentiation of hBMSCs.                                    | [61]      |
| Jiang et al., 2018   | hBMSCs       | ITF q                | cross-sectional | NK                                      | NK                                                  | NK                           | To explore whether hBMSCs-derived exosomes extracted from OP patients could inhibit osteogenesis via microRNA-21/SMAD7.                               | [55]      |
| Kelch et al., 2017   | Serum & bone | Q q                  | case-control    | OP: 50% F, 50% M<br>HV: 50% F, 50% M    | 14 OP<br>14 HV                                      | 80<br>71.4                   | To determine the correlation of miRNAs with BMD and gender and study the intracellular expression of these miRNAs in different bone cell populations. | [56]      |
| Kocijan et al., 2016 | whole blood  | Q q                  | case-control    | OP: 55.6% F, 4.4% M<br>HV: 59% F, 41% M | 36 idiopathic OP & low-traumatic fractures<br>39 HV | 46.6 ± 13.0<br>46.6 ± 9.4    | Evaluation of c-miRNA signatures with idiopathic and PMOP low-traumatic fractures                                                                     | [42]      |
| Kong et al., 2021    | plasma       | Q s                  | case-control    | 100% F<br>PM                            | 5 OP<br>5 HV                                        | 57,6 ± 2,88<br>55,20 ± 3,27  | To explore the role of plasma miRNAs in exosomes in early PM women with various bone mineral densities                                                | [51]      |

Table S4: Continued

| First author, Year           | Tissue           | Extraction Detection | Study design    | Gender                         | Sample size       | Age (years)                 | Primary outcome                                                                                                                                                       | Reference |
|------------------------------|------------------|----------------------|-----------------|--------------------------------|-------------------|-----------------------------|-----------------------------------------------------------------------------------------------------------------------------------------------------------------------|-----------|
| Li et al., 2014              | plasma           | Q<br>q               | case-control    | 100% F<br>PM                   | 40 OP<br>40 HV    | 57.5 ± 11.3<br>56.5 ± 10.5  | To examine the levels of miR-21, miR-133a and miR-146a in the plasma of PM women and investigate with sensitivity to BMD whether these plasma miRNAs levels correlate | [57]      |
| Li et al., 2018              | whole blood      | Q<br>q               | cross-sectional | 100% F<br>PM                   | 10 OP<br>10 HV    | 59 - 80<br>62 - 75          | To assess miR-133 expression in serum isolated from PMOP patients                                                                                                     | [62]      |
| Li et al., 2021              | serum            | ITF<br>q             | cross-sectional | NK                             | 10 PM OP<br>10 HV | NK                          | To explore the function of lncRNA H19 in estrogen-induced osteogenic differentiation of hBMSCs                                                                        | [72]      |
| Lin et al., 2019             | serum            | Q<br>q               | cross-sectional | 100% F<br>PM                   | 15 OP<br>15 HV    | 58 - 65<br>58 - 65          | To identify circulating miR-338 associated with PMOP and perform functional validation <i>in vivo</i> and <i>in vitro</i> .                                           | [50]      |
| Liu et al., 2018             | serum            | ITF<br>q             | cross-sectional | NK                             | 5 OP<br>5 HV      | NK                          | To research whether miR-96 can regulate osteogenic differentiation of BMSCs and be regarded as a biomarker in serum for OP                                            | [46]      |
| Lv et al., 2015              | hBMSCs           | ITF<br>q             | cross-sectional | 100% F                         | 5 PM OP<br>5 HV   | 51 – 59<br>41 - 46          | To explore how estrogen deficiency affects miR-133 expression and how miR-133 is involved in osteogenic differentiation of hBMSCs                                     | [63]      |
| Panach et al., 2015          | serum            | Q<br>q               | case-control    | 100% F                         | 8 OP<br>5 HV      | 79.6 ± 3.1<br>63.4 ± 8.1    | To identify specific miRNAs in OP bone fracture patients compared to those in osteoarthritic controls                                                                 | [58]      |
| Ramírez-Salazar et al., 2018 | serum            | Q<br>q               | case-control    | 100% F<br>PM                   | 20 OP<br>20 HV    | 73.75 ± 4.46<br>71.1 ± 3.72 | To analyze the expression of miRNAs in serum of patients with OP and HV.                                                                                              | [44]      |
| Seeliger et al., 2014        | serum & bone     | Q<br>q               | case-control    | OP: 70% F, 30% M<br>HV: 100% F | 10 OP<br>10 HV    | 79.3<br>78.8                | To identify specific miRNAs in patients with OP fractures compared with non-OP fractures                                                                              | [59]      |
| Shao et al., 2020            | serum<br>exosome | ITF<br>s             | case-control    | 100%<br>PM                     | 12 OP<br>6 HV     | NK                          | To evaluate the role of exosomal miRNAs in the diagnosis and prediction of OP in PM females with OP.                                                                  | [38]      |

Table S4: Continued

| First author, Year       | Tissue                | Extraction Detection | Study design    | Gender                                      | Sample size                                  | Age (years)                         | Primary outcome                                                                                                                                                                                                                          | Reference |
|--------------------------|-----------------------|----------------------|-----------------|---------------------------------------------|----------------------------------------------|-------------------------------------|------------------------------------------------------------------------------------------------------------------------------------------------------------------------------------------------------------------------------------------|-----------|
| Suarjana et al., 2019    | serum                 | ATF q                | cross-sectional | 100% F                                      | 60 PM OP<br>60 HV                            | 62<br>58.5                          | To determine the role of serum miR-21 expression, concentration of RANKL, OPG, TGF- $\beta$ 1, sclerostin and serum calcium, RANKL/OPG ratio, and physical activity on BMD of spine in hypoestrogenic PMOP compared with no osteoporosis | [60]      |
| Sun et al., 2020         | plasma                | ITF q                | cross-sectional | OP: 91.7% F, 8.3% M<br>HV: 66.7% F, 33.3% M | 12 OP<br>4 HV                                | 68.9<br>47.8                        | To investigate miRNAs in the plasma of OP patients $\pm$ VF compared with non-osteoporotic HV subjects and to discover a role for miR-19b in osteogenesis                                                                                | [66]      |
| Teng et al., 2021        | plasma                | ITF q                | cross-sectional | 100% F<br>PM                                | 28 OP<br>25 HV                               | 60.8 $\pm$ 6.86<br>50.1 $\pm$ 3.65  | To analyze the involvement of TUG1 in OP and to explore the interaction between TUG1 and miR-23b in the osteogenic differentiation of human hBMSCs.                                                                                      | [45]      |
| Wang et al., 2012        | circulating monocytes | ATF q                | case-control    | 100% F<br>PM                                | 10 OP<br>10 HV                               | 61.6 $\pm$ 2.6<br>63.6 $\pm$ 3.2    | To find significant miRNA biomarkers in human circulating monocytes underlying PMOP.                                                                                                                                                     | [64]      |
| Wang et al., 2020        | hBMSCs                | ITF q                | cross-sectional | 100% F                                      | 30 PM PO<br>20 HV                            | NK                                  | To determine how lncRNA DANCER, miR-320a, and CTNNB1 interact with each other and regulate osteogenic differentiation in OP.                                                                                                             | [70]      |
| Wang et al., 2020        | whole blood           | ITF, Qs              | cross-sectional | 100% F                                      | 3 PM OP<br>3 HV                              | 75,16 $\pm$ 3,54<br>72,5 $\pm$ 7,42 | To find the potential differentially expressed miRNAs in PMOP                                                                                                                                                                            | [37]      |
| Yavropoulou et al., 2017 | serum                 | Q q                  | case control    | 100% F<br>PM                                | 70 LBM $\pm$ VF<br>30 normal BMD             | 69.5 $\pm$ 7.0<br>68 $\pm$ 5        | To investigate serum levels of specific miRNAs, know regulators of bone metabolism, in PM women with LBM $\pm$ VF.                                                                                                                       | [23]      |
| Zarecki et al., 2020     | serum                 | Q q                  | case-control    | 100% F<br>PM                                | 76 low BMD $\pm$ VF $\pm$ treatment<br>40 HV | 69.03<br>68.8                       | To compare the levels of c-miRNAs in older women with OP VF, $\pm$ low BMD and HV, and to correlate miRNAs expression levels with bone turnover markers.                                                                                 | [43]      |

Table S4: Continued

| First author, Year | Tissue      | Extraction Detection | Study design    | Gender | Sample size                                     | Age (years) | Primary outcome                                                                              | Reference |
|--------------------|-------------|----------------------|-----------------|--------|-------------------------------------------------|-------------|----------------------------------------------------------------------------------------------|-----------|
| Zhang et al., 2019 | whole blood | ITF q                | cross-sectional | NK     | 30 OP<br>30 HV                                  | NK          | To explore the role of miRNA-9-5p in regulating OP development and its underlying mechanism. | [39]      |
| Zhao et al., 2019  | bone        | ITF q                | cross-sectional | 100% F | 40 PM OP with fractures<br>40 HV with fractures | NK          | To explore the potential mechanism of miR-128 in OP                                          | [40]      |

Abbreviations: ATF, Ambion Thermo Fisher; BMD, Bone Mineral Density; c-miRNAs, circulating miRNAs; CTNNB1, Catenin beta-1's gene; DANCER, Differentiation Antagonizing Non-Protein Coding RNA; F, female; FM, fibromyalgia; GAS5, Growth Arrest Specific 5; hBMSCs, Human Bone Marrow Mesenchymal Stem Cell; HV, Healthy volunteers; ITF, Invitrogen Thermo Fisher; LBM, low bone mass; MALAT1, metastasis associated lung adenocarcinoma transcript 1; M, male; NGS, next-generation sequencing; NK, not know; OP, osteoporosis; OPG, Osteoprotegerin; PM, post menopause; q, Quantitative Reverse Transcription Polymerase Chain Reaction; Q, Qiagen; RANKL, receptor activator of nuclear factor-  $\kappa$ B ligand; ROR, regulator of reprogramming; s, sequencing ; TGF- $\beta$ 1, Transforming growth factor beta 1; TUG1, taurine up-regulated 1; VF, vertebral fracture
